# Supplementary material for: Integrative analysis and experiments to explore GAS1 as a prognostic target for ovarian cancer based on angiogenesis-related genes
Source: Research Square preprint supplement (doi:10.21203/rs.3.rs-7313738/v1), 2025-08-22
Supplement: Supplementary file 1 [file 21f740887321c5b83f43942d.docx]

**Raw Western blots data**

**OVCAR3**

**nc si-1 si-2 si-3**


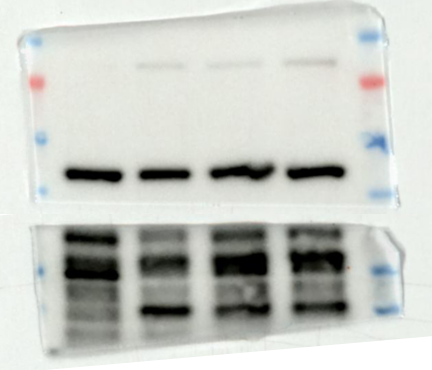


55kDa

40kDa

35kDa

25kDa

70kDa

β-actin

GAS1

**SKOV3**

**nc Vector GAS1**


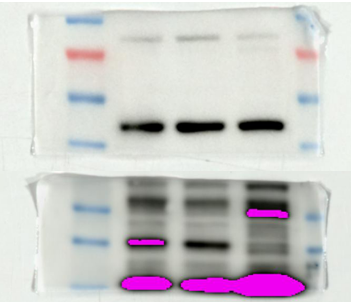


70kDa

55kDa

40kDa

35kDa

25kDa

β-actin

GAS1

**HEY**

**Nc Vector GAS1**


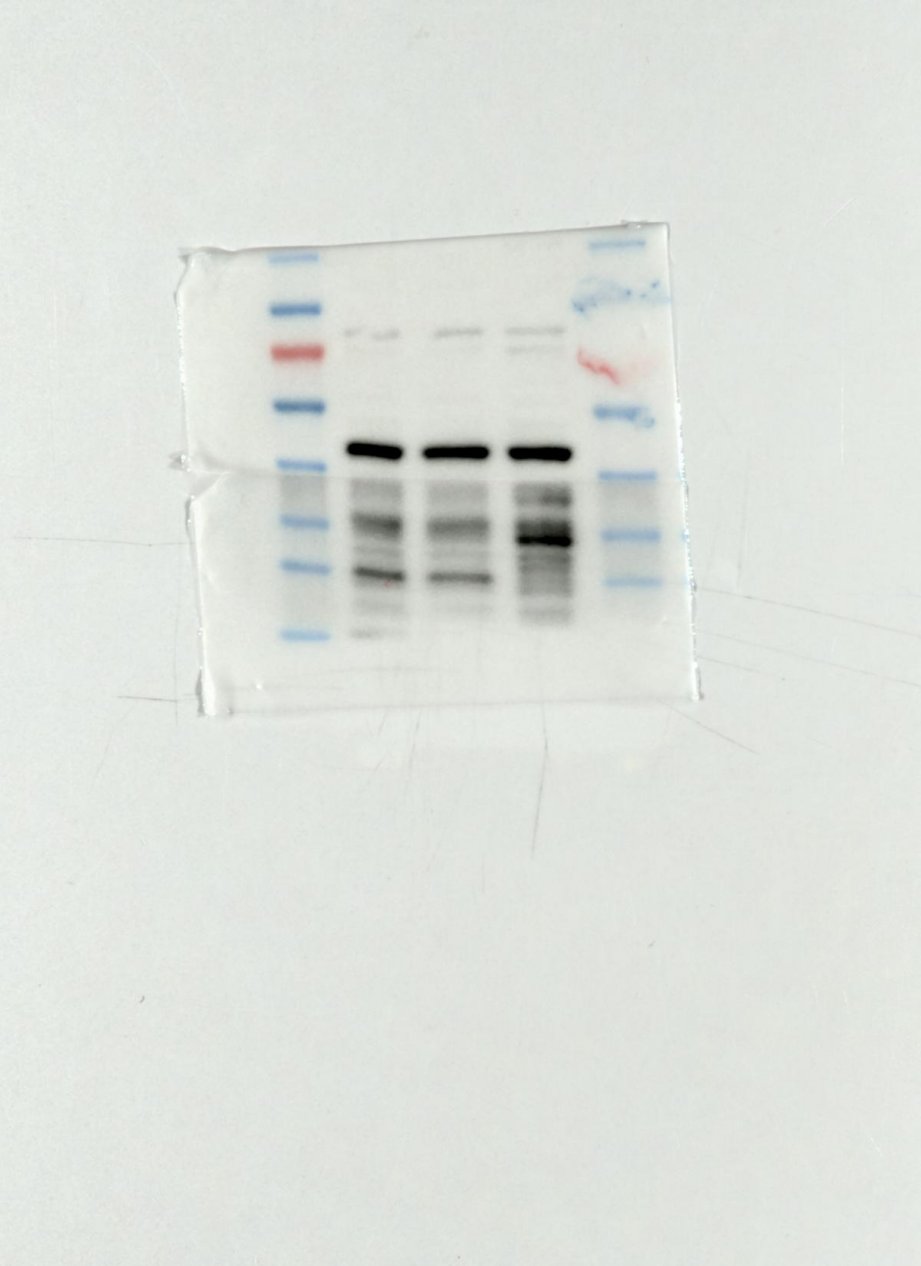


GAS1

β-actin

70kDa

55kDa

40kDa

35kDa

25kDa
