# Supplementary material for: Integrative analysis and experiments to explore GAS1 as a prognostic target for ovarian cancer based on angiogenesis-related genes
Source: Research Square preprint supplement (doi:10.21203/rs.3.rs-7313738/v1), 2025-08-22
Supplement: Supplementary file 2 [file b953be322b2a75553f02fdc0.docx]

**Supplementary Figures**


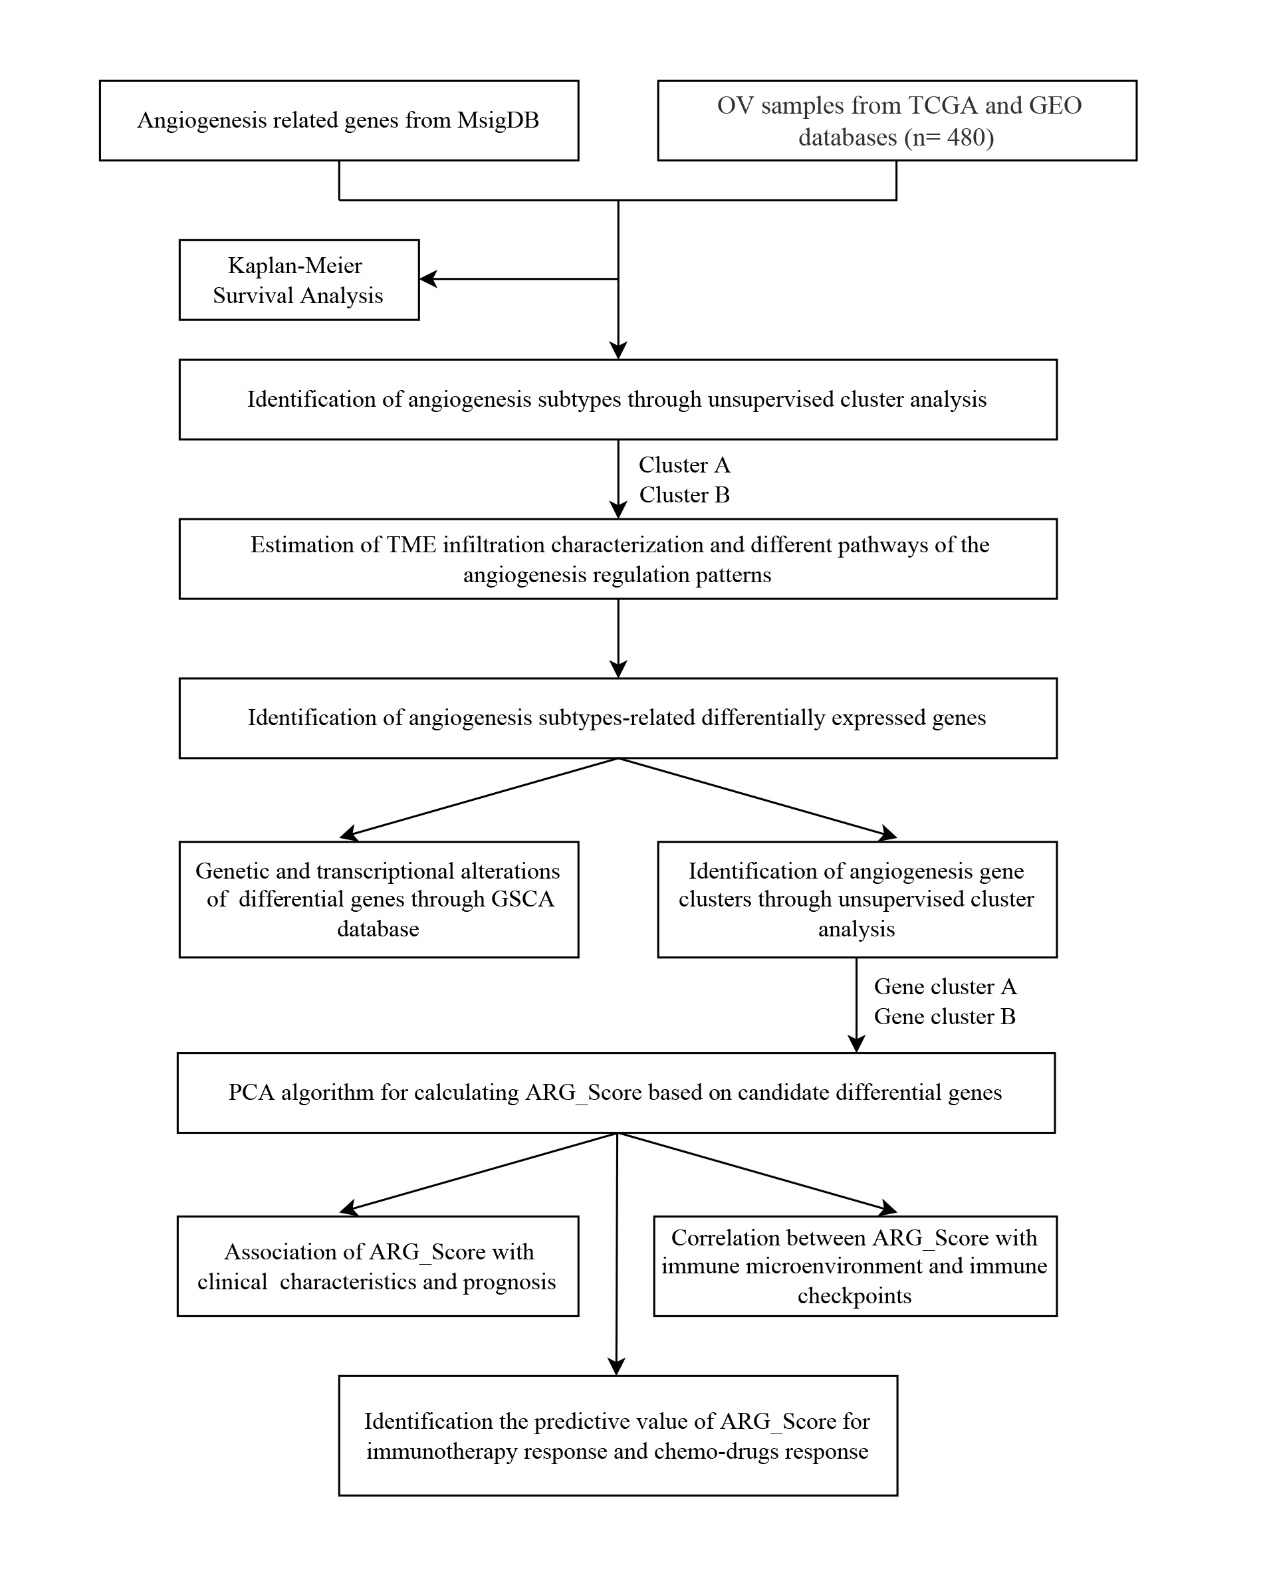


Figure S1 The entire analytical process of the study.

**
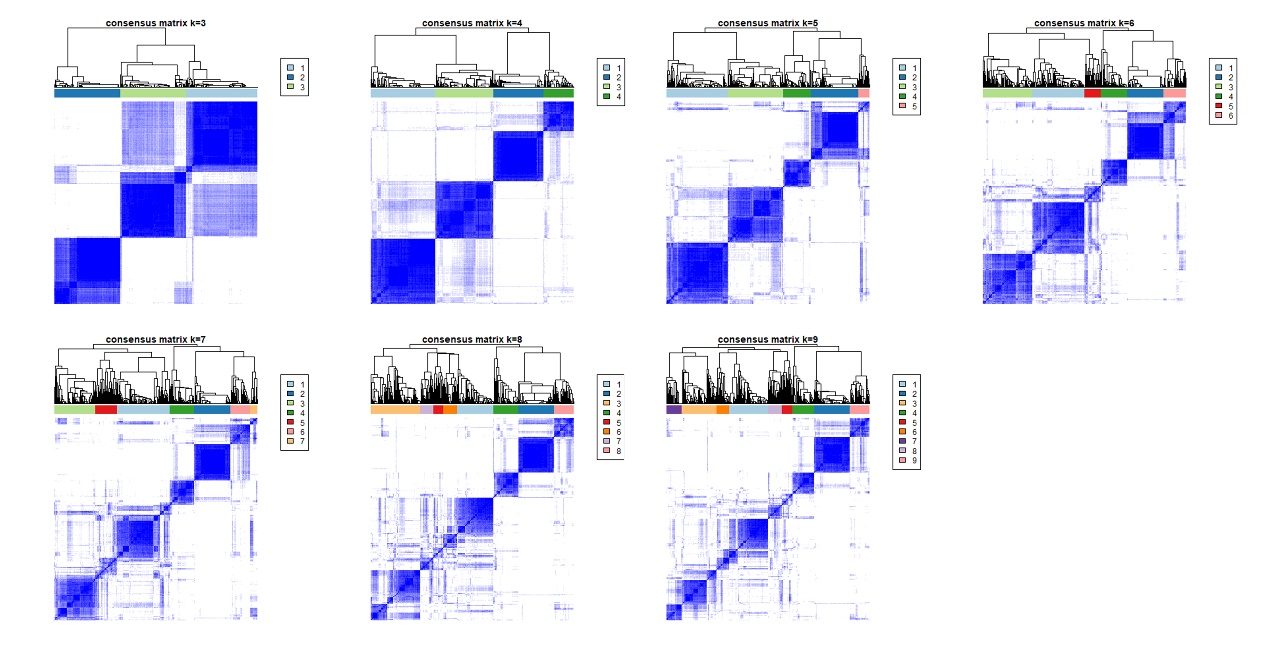
**

Figure S2 Unsupervised clustering of pyroptosis-related genes and Consensus matrix heatmaps for k = 3-9.

**
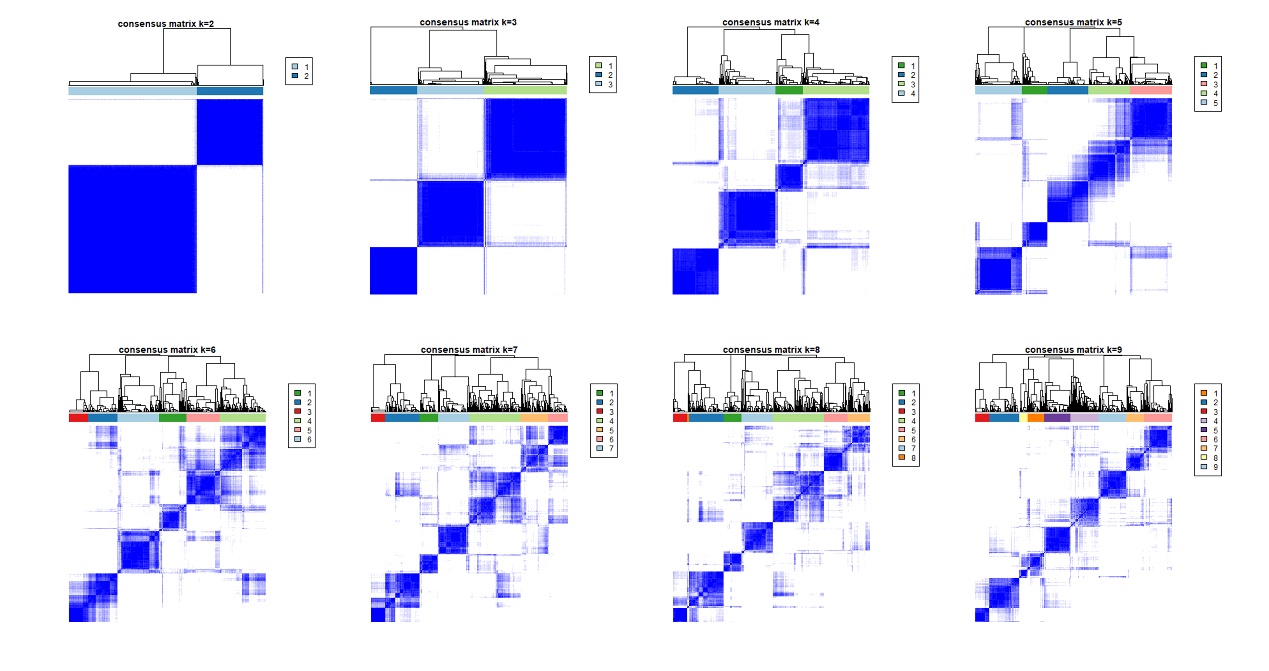
**

Figure S3 Unsupervised clustering of pyroptosis-related genes and Consensus matrix heatmaps for k =2-9.


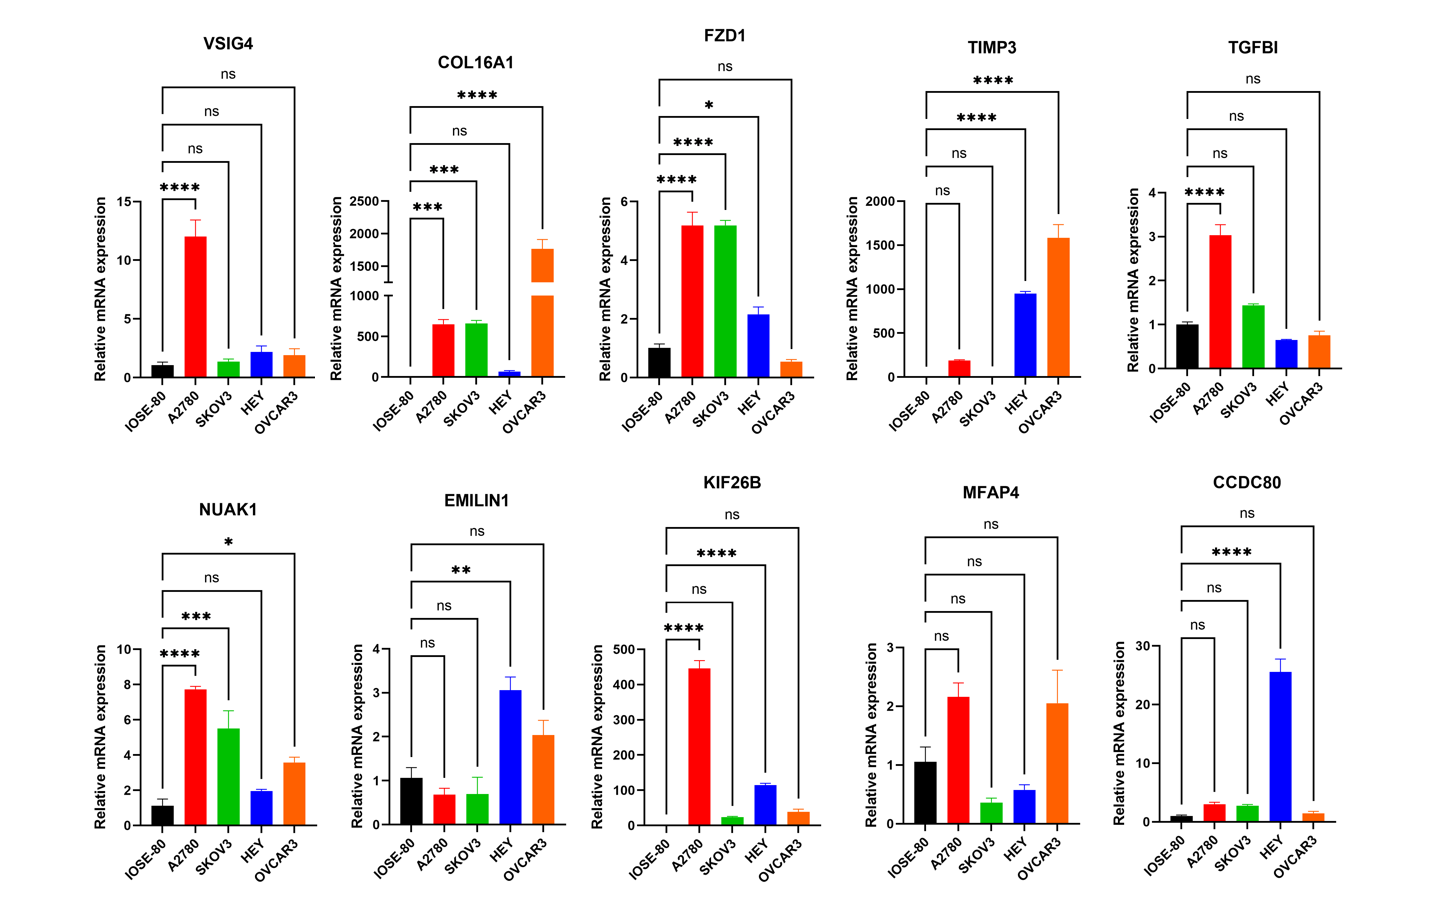


Figure S4 Relative mRNA levels of the 10 key genes shown in normal cell compared with tumor cells.
